# Supplementary material for: Activities of Clinical Expertise and Research in a Rare Disease Referral Centre: A Place for Telemedicine beyond the COVID-19 Pandemic?
Source: MDPI journal article supplement (doi:10.3390/healthcare11172447), 2023-08-31
Supplement: s1 [file s1]

**Supplementary Table 3. Questionnaire on views about telemedicine and clinical research for physician-investigators at the Internal Medicine and Clinical Immunology Department, CHU Lille, France**

|                                                                                                                                                                                                                                          |                       |                       |                       |                       |                       |                |
|------------------------------------------------------------------------------------------------------------------------------------------------------------------------------------------------------------------------------------------|-----------------------|-----------------------|-----------------------|-----------------------|-----------------------|----------------|
| <b>1. Have you heard of telemedicine?</b>                                                                                                                                                                                                |                       |                       |                       |                       |                       |                |
| <input type="radio"/> Yes <input type="radio"/> No                                                                                                                                                                                       |                       |                       |                       |                       |                       |                |
| <b>2. Have you been an investigator in a clinical research study?</b>                                                                                                                                                                    |                       |                       |                       |                       |                       |                |
| <input type="radio"/> Yes <input type="radio"/> No                                                                                                                                                                                       |                       |                       |                       |                       |                       |                |
| <b>3. Have you included patients in a clinical research protocol?</b>                                                                                                                                                                    |                       |                       |                       |                       |                       |                |
| <input type="radio"/> Yes <input type="radio"/> No                                                                                                                                                                                       |                       |                       |                       |                       |                       |                |
| <b>4. Have you conducted or participated in a patient visit in the context of a protocol?</b>                                                                                                                                            |                       |                       |                       |                       |                       |                |
| <input type="radio"/> Yes <input type="radio"/> No                                                                                                                                                                                       |                       |                       |                       |                       |                       |                |
| <b>5. Do you think that having to visit the hospital more regularly would make patients more reluctant to take part in a clinical research protocol?</b>                                                                                 |                       |                       |                       |                       |                       |                |
|                                                                                                                                                                                                                                          | 1                     | 2                     | 3                     | 4                     | 5                     |                |
| Strongly disagree                                                                                                                                                                                                                        | <input type="radio"/> | Strongly agree |
| <b>6. Do you think that a reduction in the number of on-site visits through the use of a telemedicine tool could increase the number of inclusions in a protocol?</b>                                                                    |                       |                       |                       |                       |                       |                |
|                                                                                                                                                                                                                                          | 1                     | 2                     | 3                     | 4                     | 5                     |                |
| Strongly disagree                                                                                                                                                                                                                        | <input type="radio"/> | Strongly agree |
| <b>7. If a clinical research study included the possibility of conducting some visits where the patient would stay at home and the physician stay in his/her office:<br/>Do you think this could be less time consuming for you?</b>     |                       |                       |                       |                       |                       |                |
|                                                                                                                                                                                                                                          | 1                     | 2                     | 3                     | 4                     | 5                     |                |
| Strongly disagree                                                                                                                                                                                                                        | <input type="radio"/> | Strongly agree |
| <b>8. If a clinical research study included the possibility of conducting some visits where the patient would stay at home and the physician stay in his/her office:<br/>Do you think this could be more convenient for the patient?</b> |                       |                       |                       |                       |                       |                |
|                                                                                                                                                                                                                                          | 1                     | 2                     | 3                     | 4                     | 5                     |                |
| Strongly disagree                                                                                                                                                                                                                        | <input type="radio"/> | Strongly agree |
| <b>9. Do you think it could be dangerous for a patient included in a clinical research protocol to make some visits by teleconsultation?</b>                                                                                             |                       |                       |                       |                       |                       |                |
|                                                                                                                                                                                                                                          | 1                     | 2                     | 3                     | 4                     | 5                     |                |
| Strongly disagree                                                                                                                                                                                                                        | <input type="radio"/> | Strongly agree |
| <b>10. Do you think telemedicine could improve patient management in clinical research?</b>                                                                                                                                              |                       |                       |                       |                       |                       |                |

|                   |                       |                       |                       |                       |                       |                |
|-------------------|-----------------------|-----------------------|-----------------------|-----------------------|-----------------------|----------------|
|                   | 1                     | 2                     | 3                     | 4                     | 5                     |                |
| Strongly disagree | <input type="radio"/> | Strongly agree |
