# Supplementary material for: Activities of Clinical Expertise and Research in a Rare Disease Referral Centre: A Place for Telemedicine beyond the COVID-19 Pandemic?
Source: MDPI journal article supplement (doi:10.3390/healthcare11172447), 2023-08-31
Supplement: s1 [file s1]

**Supplementary Table 4. Questionnaire on views about telemedicine and clinical research for patients included in a clinical research protocol at the Internal Medicine and Clinical Immunology Department, CHU Lille, France**

|                                                                                                                                                                                                                                           |                       |                       |                       |                       |                       |                |
|-------------------------------------------------------------------------------------------------------------------------------------------------------------------------------------------------------------------------------------------|-----------------------|-----------------------|-----------------------|-----------------------|-----------------------|----------------|
| <i>You have agreed to take part in a clinical research protocol.</i>                                                                                                                                                                      |                       |                       |                       |                       |                       |                |
| <b>1. Do you have to visit the hospital more frequently since the start of the study?</b>                                                                                                                                                 |                       |                       |                       |                       |                       |                |
| <input type="radio"/> Yes <input type="radio"/> No                                                                                                                                                                                        |                       |                       |                       |                       |                       |                |
| <b>2. Do you find it difficult to organise your visits to the hospital?</b>                                                                                                                                                               |                       |                       |                       |                       |                       |                |
| <input type="radio"/> Yes <input type="radio"/> No                                                                                                                                                                                        |                       |                       |                       |                       |                       |                |
| If Yes, why?: _____                                                                                                                                                                                                                       |                       |                       |                       |                       |                       |                |
| <b>3. Have you already heard of telemedicine and teleconsultation?</b>                                                                                                                                                                    |                       |                       |                       |                       |                       |                |
| <i>Definition of telemedicine: telemedicine is a form of medical practice conducted remotely using information and communication technologies to establish a link between patients and their doctors or between health professionals.</i> |                       |                       |                       |                       |                       |                |
| <i>Definition of teleconsultation: remote consultation between a patient (whether or not accompanied by a health professional) and a doctor.</i>                                                                                          |                       |                       |                       |                       |                       |                |
| <input type="radio"/> Yes <input type="radio"/> No                                                                                                                                                                                        |                       |                       |                       |                       |                       |                |
| <b>4. If you could choose between a consultation at the hospital and a teleconsultation at home, which would you choose?</b>                                                                                                              |                       |                       |                       |                       |                       |                |
| <input type="radio"/> Hospital <input type="radio"/> Home                                                                                                                                                                                 |                       |                       |                       |                       |                       |                |
| <b>5. Would you feel reassured if, in the context of the research protocol, there were additional follow-up visits by teleconsultation?</b>                                                                                               |                       |                       |                       |                       |                       |                |
|                                                                                                                                                                                                                                           | 1                     | 2                     | 3                     | 4                     | 5                     |                |
| Not at all reassured                                                                                                                                                                                                                      | <input type="radio"/> | Very reassured |
| <b>6. Do you think telemedicine could improve the care you receive?</b>                                                                                                                                                                   |                       |                       |                       |                       |                       |                |
| <input type="radio"/> Yes <input type="radio"/> No                                                                                                                                                                                        |                       |                       |                       |                       |                       |                |
| <b>7. If a clinical research study included the possibility of conducting some visits where the patient would stay at home and the physician stay in his/her office using a telemedicine tool:</b>                                        |                       |                       |                       |                       |                       |                |
| <b>Do you think that would take you less time?</b>                                                                                                                                                                                        |                       |                       |                       |                       |                       |                |
| <input type="radio"/> Yes <input type="radio"/> No                                                                                                                                                                                        |                       |                       |                       |                       |                       |                |
| <b>8. If a clinical research study included the possibility of conducting some visits where the patient would stay at home and the physician stay in his/her office using a telemedicine tool:</b>                                        |                       |                       |                       |                       |                       |                |
| <b>Do you think it would be more convenient for you?</b>                                                                                                                                                                                  |                       |                       |                       |                       |                       |                |
| <input type="radio"/> Yes <input type="radio"/> No                                                                                                                                                                                        |                       |                       |                       |                       |                       |                |
| <b>9. If a clinical research study included the possibility of conducting some visits where the</b>                                                                                                                                       |                       |                       |                       |                       |                       |                |

**patient would stay at home and the physician stay in his/her office using a telemedicine tool:**

**Do you think that could be dangerous for you?**

|                     |                       |                       |                       |                       |                       |                |
|---------------------|-----------------------|-----------------------|-----------------------|-----------------------|-----------------------|----------------|
|                     | 1                     | 2                     | 3                     | 4                     | 5                     |                |
| Do not agree at all | <input type="radio"/> | Agree entirely |
