# Supplementary material for: Activities of Clinical Expertise and Research in a Rare Disease Referral Centre: A Place for Telemedicine beyond the COVID-19 Pandemic?
Source: MDPI journal article supplement (doi:10.3390/healthcare11172447), 2023-08-31
Supplement: s1 [file s1]

**Supplementary Table 1. Census form for specialist opinions given by physicians of the Internal Medicine - Clinical Immunology Department, CHU Lille, France**

|                                                                                                                                                                                                                                                                                                                                                                                                        |
|--------------------------------------------------------------------------------------------------------------------------------------------------------------------------------------------------------------------------------------------------------------------------------------------------------------------------------------------------------------------------------------------------------|
| <b>1. Date of the opinion</b><br>dd/mm/yyyy                                                                                                                                                                                                                                                                                                                                                            |
| <b>2. Context of the request for an opinion</b><br><input type="radio"/> Through our dedicated hotline (on-call physician)<br><input type="radio"/> Outside our dedicated hotline                                                                                                                                                                                                                      |
| <b>3. Method used to contact you</b><br><input type="radio"/> Phone <input type="radio"/> e-mail <input type="radio"/> Other: _____                                                                                                                                                                                                                                                                    |
| <b>4. Person requesting the opinion</b><br><input type="radio"/> Hospital physician: Lille University Hospital<br><input type="radio"/> Hospital physician: outside Lille University Hospital<br><input type="radio"/> Private practitioner: generalist<br><input type="radio"/> Private practitioner: specialist<br><input type="radio"/> Patient (or relative)<br><input type="radio"/> Other: _____ |
| <b>5. If the person requesting the opinion is a physician, indicate the speciality:</b><br>Free text: _____                                                                                                                                                                                                                                                                                            |
| <b>6. If the person requesting the opinion is a physician, indicate his/her workplace:</b><br>Free text: _____                                                                                                                                                                                                                                                                                         |
| <b>7. Patient who is the subject of the opinion</b><br><input type="radio"/> Patient already known to the Department <input type="radio"/> Patient not known to the Department                                                                                                                                                                                                                         |
| <b>8. Reason the opinion is being requested</b><br>Free text: _____                                                                                                                                                                                                                                                                                                                                    |
| <b>9. Bedside visit</b><br><input type="radio"/> Yes <input type="radio"/> No                                                                                                                                                                                                                                                                                                                          |
| <b>10. Conclusion of the opinion</b><br><input type="radio"/> Admit patient in hospitalisation unit<br><input type="radio"/> Schedule day-patient clinic visit<br><input type="radio"/> Scheduled consultation<br><input type="radio"/> Continuation of remote patient management (by phone or email)<br><input type="radio"/> Ad hoc opinion<br><input type="radio"/> Other: _____                    |
| <b>11. Total time devoted to the opinion</b><br><i>If a visit outside the Department was needed, also include the duration of the visit</i><br>hh:mm:ss                                                                                                                                                                                                                                                |
