# Supplementary material for: Activities of Clinical Expertise and Research in a Rare Disease Referral Centre: A Place for Telemedicine beyond the COVID-19 Pandemic?
Source: MDPI journal article supplement (doi:10.3390/healthcare11172447), 2023-08-31
Supplement: s1 [file s1]

**Supplementary Table 2. Feedback questionnaire on specialist opinions given by physicians of the Internal Medicine and Clinical Immunology Department, CHU Lille, France.**

|                                                                                                                                                                                                                                                                                                                          |                       |                       |                       |                       |                     |
|--------------------------------------------------------------------------------------------------------------------------------------------------------------------------------------------------------------------------------------------------------------------------------------------------------------------------|-----------------------|-----------------------|-----------------------|-----------------------|---------------------|
| <b>1. During the period covered by the census of medical opinions given in the Department, how exhaustive do you think you were in declaring your opinions?</b>                                                                                                                                                          |                       |                       |                       |                       |                     |
|                                                                                                                                                                                                                                                                                                                          | 1                     | 2                     | 3                     | 4                     |                     |
| Not at all exhaustive                                                                                                                                                                                                                                                                                                    | <input type="radio"/> | <input type="radio"/> | <input type="radio"/> | <input type="radio"/> | Entirely exhaustive |
| <b>2. On average, how many opinions would you say you forgot to report in a standard week (i.e. not on call)?</b><br><input type="radio"/> < 2/week<br><input type="radio"/> 2-5/ week<br><input type="radio"/> 6-10/ week<br><input type="radio"/> >10/ week                                                            |                       |                       |                       |                       |                     |
| <b>3. On average, how many opinions would you say you forgot to report during a week on call?</b><br><input type="radio"/> < 2/ week<br><input type="radio"/> 2-5/ week<br><input type="radio"/> 6-10/ week<br><input type="radio"/> >10/ week<br><input type="radio"/> I was not on call during the period of the study |                       |                       |                       |                       |                     |
| <b>4. How exhaustive do you think you were in declaring your opinions given by phone?</b>                                                                                                                                                                                                                                |                       |                       |                       |                       |                     |
|                                                                                                                                                                                                                                                                                                                          | 1                     | 2                     | 3                     | 4                     |                     |
| Not at all exhaustive                                                                                                                                                                                                                                                                                                    | <input type="radio"/> | <input type="radio"/> | <input type="radio"/> | <input type="radio"/> | Entirely exhaustive |
| <b>5. How exhaustive do you think you were in declaring your opinions given by e-mail?</b>                                                                                                                                                                                                                               |                       |                       |                       |                       |                     |
|                                                                                                                                                                                                                                                                                                                          | 1                     | 2                     | 3                     | 4                     |                     |
| Not at all exhaustive                                                                                                                                                                                                                                                                                                    | <input type="radio"/> | <input type="radio"/> | <input type="radio"/> | <input type="radio"/> | Entirely exhaustive |
| <b>6. How exhaustive do you think you were in declaring your opinions given by post?</b>                                                                                                                                                                                                                                 |                       |                       |                       |                       |                     |
|                                                                                                                                                                                                                                                                                                                          | 1                     | 2                     | 3                     | 4                     |                     |
| Not at all exhaustive                                                                                                                                                                                                                                                                                                    | <input type="radio"/> | <input type="radio"/> | <input type="radio"/> | <input type="radio"/> | Entirely exhaustive |
| <b>7. How exhaustive do you think you were in declaring your opinions that required a bedside visit?</b>                                                                                                                                                                                                                 |                       |                       |                       |                       |                     |
|                                                                                                                                                                                                                                                                                                                          | 1                     | 2                     | 3                     | 4                     |                     |
| Not at all exhaustive                                                                                                                                                                                                                                                                                                    | <input type="radio"/> | <input type="radio"/> | <input type="radio"/> | <input type="radio"/> | Entirely exhaustive |
| <b>8. How exhaustive do you think you were in declaring your opinions given to CHU Lille physicians?</b>                                                                                                                                                                                                                 |                       |                       |                       |                       |                     |
|                                                                                                                                                                                                                                                                                                                          | 1                     | 2                     | 3                     | 4                     |                     |

|                       |                       |                       |                       |                       |                     |
|-----------------------|-----------------------|-----------------------|-----------------------|-----------------------|---------------------|
| Not at all exhaustive | <input type="radio"/> | <input type="radio"/> | <input type="radio"/> | <input type="radio"/> | Entirely exhaustive |
|-----------------------|-----------------------|-----------------------|-----------------------|-----------------------|---------------------|

**9. How exhaustive do you think you were in declaring your opinions given to non-CHU Lille physicians?**

|                       |                       |                       |                       |                       |                     |
|-----------------------|-----------------------|-----------------------|-----------------------|-----------------------|---------------------|
|                       | 1                     | 2                     | 3                     | 4                     |                     |
| Not at all exhaustive | <input type="radio"/> | <input type="radio"/> | <input type="radio"/> | <input type="radio"/> | Entirely exhaustive |

**10. How exhaustive do you think you were declaring your opinions given to generalist private practitioners?**

|                       |                       |                       |                       |                       |                     |
|-----------------------|-----------------------|-----------------------|-----------------------|-----------------------|---------------------|
|                       | 1                     | 2                     | 3                     | 4                     |                     |
| Not at all exhaustive | <input type="radio"/> | <input type="radio"/> | <input type="radio"/> | <input type="radio"/> | Entirely exhaustive |

**11. How exhaustive do you think you were in declaring your opinions given to specialist private practitioners?**

|                       |                       |                       |                       |                       |                     |
|-----------------------|-----------------------|-----------------------|-----------------------|-----------------------|---------------------|
|                       | 1                     | 2                     | 3                     | 4                     |                     |
| Not at all exhaustive | <input type="radio"/> | <input type="radio"/> | <input type="radio"/> | <input type="radio"/> | Entirely exhaustive |

**12. How exhaustive do you think you were in declaring your opinions given to patients (or a family member)?**

|                       |                       |                       |                       |                       |                     |
|-----------------------|-----------------------|-----------------------|-----------------------|-----------------------|---------------------|
|                       | 1                     | 2                     | 3                     | 4                     |                     |
| Not at all exhaustive | <input type="radio"/> | <input type="radio"/> | <input type="radio"/> | <input type="radio"/> | Entirely exhaustive |

**13. How precise do you think you were in the declared duration of your opinions?**

|                    |                       |                       |                       |                       |                   |
|--------------------|-----------------------|-----------------------|-----------------------|-----------------------|-------------------|
|                    | 1                     | 2                     | 3                     | 4                     |                   |
| Not at all precise | <input type="radio"/> | <input type="radio"/> | <input type="radio"/> | <input type="radio"/> | Extremely precise |

**14. In general, how time-consuming did you find these declarations of opinions?**

|                           |                       |                       |                       |                       |                          |
|---------------------------|-----------------------|-----------------------|-----------------------|-----------------------|--------------------------|
|                           | 1                     | 2                     | 3                     | 4                     |                          |
| Not at all time-consuming | <input type="radio"/> | <input type="radio"/> | <input type="radio"/> | <input type="radio"/> | Extremely time-consuming |

**15. In general, how tedious did you find these declarations of opinions?**

|                    |                       |                       |                       |                       |                   |
|--------------------|-----------------------|-----------------------|-----------------------|-----------------------|-------------------|
|                    | 1                     | 2                     | 3                     | 4                     |                   |
| Not at all tedious | <input type="radio"/> | <input type="radio"/> | <input type="radio"/> | <input type="radio"/> | Extremely tedious |

**16. In general, were you able to declare these opinions at the time you gave them?**

|            |                       |                       |                       |                       |                       |
|------------|-----------------------|-----------------------|-----------------------|-----------------------|-----------------------|
|            | 1                     | 2                     | 3                     | 4                     |                       |
| Not at all | <input type="radio"/> | <input type="radio"/> | <input type="radio"/> | <input type="radio"/> | Yes, at the same time |
