# Supplementary material for: Activities of Clinical Expertise and Research in a Rare Disease Referral Centre: A Place for Telemedicine beyond the COVID-19 Pandemic?
Source: Healthcare (Basel). 2023 Aug 31;11(17):2447. doi: 10.3390/healthcare11172447 (PMC10487162; doi:10.3390/healthcare11172447)
Supplement: Supplementary file 1 [file healthcare-11-02447-s001.zip]

Archive with 4 entries (4 files):
- Tableau Supp 1.pdf
- Tableau Supp 2.pdf
- Tableau Supp 3.pdf
- Tableau Supp 4.pdf
